# Supplementary material for: Spatiotemporal connectivity dynamics in spatially structured populations
Source: PubMed Central journal article supplement (PMC9796704; doi:10.1111/1365-2656.13783), 2022-07-30
Supplement: JANE-91-2050-s004.pdf [file JANE-91-2050-s004.pdf]

# Appendix S1

Joseph Drake

20220720

## Overview

Drake, J. C., Lambin, X., and Sutherland, C. 2022. Spatiotemporal connectivity dynamics in spatially structured populations. *Journal of Animal Ecology*. DOI: 10.1111/1365-2656.13783

Supplemental information referred to as Appendix S1 in text, including 1) NIMBLE code for dynamic metapopulation code with prior distribution details 2) R code for execution of model, and 3) GVS model selection script

## Nimble Dynamic Metapopulation Model

Save this as a separate R script named “nimblecode.R” so that it can be sourced by execution script.

```
#####  
# A Dynamic Col-Ext metapopulation model SPOM  
# Data:  
# Area: a vector of patch sizes  
# dmat: npatch x npatch distance matrix  
# Y: npatch x nyears matrix of detection FREQUENCIES  
# K: npatch x t matrix of number of VISITS  
# z: npatch X nyear matrix of occupancy (1 or NA)  
# nsite: numnber of patches  
# nyear: numnber of years  
  
flexispom <- nimbleCode({  
  
  #~~~~~PRIORS~~~~~#  
  
  #PSI1 prior  
  psi1 ~ dunif(0,1)  
  
  # Detection prior  
  
  p_mu ~ dnorm(0,0.001)  
  p_sd ~ dunif(0,10)  
  p_tau <- pow(p_sd, -2)  
  for(t in 1:(nyear.obs)){  
    P_t[t] ~ dnorm(p_mu, p_tau)  
    logit(p_t[t]) <- P_t[t]
```

```

}

# Connectivity model priors

b1_mu ~ dnorm(0, 0.01)
b1_sd ~ dunif(0,10)
b1_tau <- pow(b1_sd, -2)

alpha_mu ~ dnorm(0, 0.01)
alpha_sd ~ dunif(0, 10)
alpha_tau <- pow(alpha_sd, -2)

for(t in 1:(nyear.sim-1)){

  Alpha[t] ~ dnorm(0, alpha_tau)
  alpha[t] <- alpha_mu + c.dyn*Alpha[t]
  sigterm[t] <- 1/(exp(alpha[t])) # sigterm is mean dispersal distance

  B1_t[t] ~ dnorm(0, b1_tau)
  b1_t[t] <- exp(b1_mu + c.dyn*B1_t[t])

}

# Extinction model priors
# Logit(ext) = g0 + g1 * Area
g0_mu ~ dnorm(0, 0.01)
g0_sd ~ dunif(0,10)
g0_tau <- pow(g0_sd, -2)
g1_mu ~ dnorm(0, 0.01)
g1_sd ~ dunif(0,10)
g1_tau <- pow(g0_sd, -2)

#time specific random transition parameters
for(t in 1:(nyear.sim-1)){
  G0_t[t] ~ dnorm(0, g0_tau)
  G1_t[t] ~ dnorm(0, g1_tau)
  g0_t[t] <- g0_mu + e.dyn*G0_t[t]
  g1_t[t] <- g1_mu + e.dyn*G1_t[t]
}

#~~~~~Likelihood~~~~~#

for(i in 1:nsite){ #initial occupancy t0
  z[i,1] ~ dbern(psi1)
}

for(k in 2:nyear.sim){ #for occupancy t1 and after

```

```

for(i in 1:nsite){
  for(j in 1:nsite){
    con[i,j,k-1] <- exp(-sigterm[k-1] * dmat[i,j]) * #kernel
                  (1 - equals(i,j)) * #self
                  max(z[j,k-1], struct) * #functional weight
                  Area[j] #area weight contrib
  }

  #transition probs
  conx[i,k-1] <- sum(con[i,1:nsite,k-1])

  col[i,k-1] <- 1-exp(-b1_t[k-1]*conx[i,k-1]) # akin to Sutherland et al
. 2014 to help with model convergence
  logit(ext[i,k-1]) <- g0_mu + g1_mu * Area[i]

  #occupancy
  mu.z[i,k-1] <- z[i,k-1] * max(0.001, min((1-ext[i,k-1]), 0.999)) +
                (1 - z[i,k-1]) * max(0.001, min(col[i,k-1], 0.999)) # m
in-max trick to prevent calculation issues
  z[i,k] ~ dbern(mu.z[i,k-1])
}
}
#### observation model
for(i in 1:nsite){
  for (t in 1:nyear.obs){
    mu.p[i, t] <- z[i,t] * p_t[t]
    Y[i, t] ~ dbin(mu.p[i, t], K[i,t])
  }
}
#### Derived parameters
for(t in 1:nyear.sim){
  m.occ[t] <- sum(z[1:nsite,t])
}
})

```

## R Script for Model Execution

```
library(nimble)
```

```
load("Data.RData") # this is a place holder for data described below
```

```

# Data:
# Area: a vector of patch sizes
# dmat: npatch x npatch distance matrix
# Y: npatch x nyears matrix of detection FREQUENCIES
# K: npatch x t matrix of number of VISITS
# z: npatch X nyear matrix of occupancy (1 or NA)
# nsite: numnber of patches

```

```

#   nyear: number of years

data <- list(Area=Area, #
            Y=Y,      #
            K=K,      #
            dmat=dmat, #
            z=z)      #

#1. struct. connectivity (nwork position only) + static effect (beta_t = beta)
) (model UI)
#2. struct. connectivity (nwork position only) + dynamic effect (beta_t)
(model UV)
#3. funct. connectivity (z-weighted) + static effect (beta_t = beta)
(model DI)
#4. funct. connectivity (z-weighted) + dynamic effect (beta_t)
(model DV)

#1 and 2 are *non*-demographic or demographically naive
#3 and 4 are demographic connectivity

#model 1
sta.consts.struct <- list(nyear.obs=nyear.obs,
                          nyear.sim=nyear.sim,
                          nsite=nsite,
                          c.dyn=0, #0=invariant, 1=time-varying
                          e.dyn=0, #0=invariant, 1=time-varying
                          struct=1) #1=structural, 0=functional

#model 2
dyn.consts.struct <- list(nyear.obs=nyear.obs,
                          nyear.sim=nyear.sim,
                          nsite=nsite,
                          c.dyn=1,
                          e.dyn=0,
                          struct=1) #1=structural, 0=functional

#model 3
sta.consts <- list(nyear.obs=nyear.obs,
                  nyear.sim=nyear.sim,
                  nsite=nsite,
                  c.dyn=0,
                  e.dyn=0,
                  struct=0) #1=structural, 0=functional

#model 4
dyn.consts <- list(nyear.obs=nyear.obs,

```

```

        nyear.sim=nyear.sim,
        nsite=nsite,
        c.dyn=1,
        e.dyn=0,
        struct=0) #1=structural, 0=functional

# Parameters to track
params <- c("alpha","b1_t","m.occ","sigterm", "Alpha", "alpha_mu", "b1_mu", "
B1_t")

inits <- function(){
  list( psi1=runif(1,0.1,0.9),
        p_mu=rnorm(1,0,0.1),
        p_sd=runif(1,0.1,1),
        P_t=rnorm(nyear.obs,0,0.1),

        alpha_mu=rnorm(1,0,0.1),
        alpha_sd=runif(1,0.1,1),
        b1_mu=rnorm(1,0,0.1),
        b1_sd=runif(1,0.1,1),
        B1_t=rnorm(nyear.sim-1,0,0.1),

        g0_mu=runif(1,-1,1),
        g1_mu=rnorm(1,-1,0.1),
        G0_t=rnorm(nyear.sim-1,0,0.1),
        G1_t=rnorm(nyear.sim-1,0,0.1))
}

source("nimblecode.R")

mp_DV <- nimbleMCMC(code=flexispom,
                   constants=dyn.consts,
                   data=data, inits=inits, monitors = params,
                   nchains=3, niter = 80000, nburnin = 30000, # 80k r
un 30k burnin
                   thin = 1, summary = TRUE, WAIC =FALSE,
                   check= TRUE, samples = TRUE, samplesAsCodaMCMC=TRUE)
save(mp_DV, file=paste("mp_DV",format(Sys.time(), "%Y%m%d"), ".RData", sep=""
))

mp_UV <- nimbleMCMC(code=flexispomv,
                   constants=dyn.consts.struct,
                   data=data, inits=inits, monitors = params,
                   nchains=3, niter = 80000, nburnin = 30000,
                   thin = 1, summary = TRUE, WAIC = FALSE,

```

```

                                check= TRUE, samples = TRUE, samplesAsCodaMCMC=TRUE)
save(mp_UV, file=paste("mp_UV",format(Sys.time(), "%Y%m%d"), ".RData", sep=""
))

mp_DI <- nimbleMCMC(code=flexispom,
                    constants=sta.consts,
                    data=data, inits=inits, monitors = params,
                    nchains=3, niter = 80000, nburnin = 30000,
                    thin = 1, summary = TRUE, WAIC = FALSE,
                    check= TRUE, samples = TRUE, samplesAsCodaMCMC=TRUE)
save(mp_DI, file=paste("mp_DI",format(Sys.time(), "%Y%m%d"), ".RData", sep=""
))

mp_UI <- nimbleMCMC(code=flexispom,
                    constants=sta.consts.struct,
                    data=data, inits=inits, monitors = params,
                    nchains=3, niter = 80000, nburnin = 30000,
                    thin = 1, summary = TRUE, WAIC = FALSE,           # Use
                                params2 for WAIC=TRUE
                    check= TRUE, samples = TRUE, samplesAsCodaMCMC=TRUE)
save(mp_UI, file=paste("mp_UI",format(Sys.time(), "%Y%m%d"), ".RData", sep=""
))

```

## Nimble GVS model selection Script

Save this as a separate R script named "gvscode.R" so that it can be sourced by execution script.

```

modelselection <- nimbleCode({

  #~~~~~PRIORS~~~~~#

  #PSI1 prior
  psi1 ~ dunif(0,1)

  pick ~ dcat(probs[1:4])

  mod <- equals(pick,1) * 1 +
    equals(pick,2) * 2 +
    equals(pick,3) * 3 +
    equals(pick,4) * 4

  structural <- mod.binary[mod,1] #
  c.dyn <- mod.binary[mod,2]

  #detection prior

```

```

p_mu ~ dnorm(0,0.001)
p_sd ~ dunif(0,10)
p_tau <- pow(p_sd, -2)
for(t in 1:(nyear.obs)){
  P_t[t] ~ dnorm(p_mu, p_tau)
  logit(p_t[t]) <- P_t[t]
}

#####connectivity model priors
b1_mu ~ dnorm(0, 0.01)
b1_sd ~ dunif(0,10)
b1_tau <- pow(b1_sd, -2)

alpha_mu ~ dnorm(0, 0.01)
alpha_sd ~ dunif(0, 10)
alpha_tau <- pow(alpha_sd, -2)

for(t in 1:(nyear.sim-1)){

  Alpha[t] ~ dnorm(0, alpha_tau)
  alpha[t] <- alpha_mu + c.dyn*Alpha[t]
  sigterm[t] <- 1/(exp(alpha[t]))

  B1_t[t] ~ dnorm(0, b1_tau)
  b1_t[t] <- exp(b1_mu + c.dyn*B1_t[t])

}

# Extinction model priors
g0_mu ~ dnorm(0, 0.01)
g0_sd ~ dunif(0,10)
g0_tau <- pow(g0_sd, -2)
g1_mu ~ dnorm(0, 0.01)
g1_sd ~ dunif(0,10)
g1_tau <- pow(g0_sd, -2)

#time specific random transition parameters
for(t in 1:(nyear.sim-1)){
  G0_t[t] ~ dnorm(0, g0_tau)
  G1_t[t] ~ dnorm(0, g1_tau)
  g0_t[t] <- g0_mu + e.dyn*G0_t[t]
  g1_t[t] <- g1_mu + e.dyn*G1_t[t]
}

#~~~~~Likelihood~~~~~#

for(i in 1:nsite){          #initial occupancy t0
  z[i,1] ~ dbern(psi1)
}

```

```

}

for(k in 2:nyear.sim){      #for occupancy t1 and after
  for(i in 1:nsite){
    for(j in 1:nsite){
      con[i,j,k-1] <- exp(-sigterm[k-1] * dmat[i,j]) * #kernel
        (1 - equals(i,j)) * #self
        max(z[j,k-1], structural) * #functional weight
        Area[j] #area weight contrib
    }

    #transition probs
    conx[i,k-1] <- sum(con[i,1:nsite,k-1])
    col[i,k-1] <- 1-exp(-b1_t[k-1]*conx[i,k-1]) # akin to Sutherland et al
. 2014 to help with model convergence
    logit(ext[i,k-1]) <- g0_mu + g1_mu * Area[i]

    #occupancy
    mu.z[i,k-1] <- z[i,k-1] * max(0.001, min((1-ext[i,k-1]), 0.999)) +
      (1 - z[i,k-1]) * max(0.001, min(col[i,k-1], 0.999))
    z[i,k] ~ dbern(mu.z[i,k-1])
  }
}

#### observation model
for(i in 1:nsite){
  for (t in 1:nyear.obs){
    mu.p[i, t] <- z[i,t] * p_t[t]
    Y[i, t] ~ dbin(mu.p[i, t], K[i,t])
  }
}

#### Derived parameters
for(t in 1:nyear.sim){
  m.occ[t] <- sum(z[1:nsite,t])
}
})

```

## GVS model selection R script

```
library(nimble)
```

```

# Data:
# Area: a vector of patch sizes
# dmat: npatch x npatch distance matrix
# Y: npatch x nyears matrix of detection FREQUENCIES
# K: npatch x t matrix of number of VISITS
# z: npatch X nyear matrix of occupancy (1 or NA)
# nsite: numnber of patches
# nyear: numnber of years

```



## ## Model selection matrix

```
# column 1 = func (0) vs. struc (1)
# column 2 = dynamic = 1, static =0
mod.binary <- matrix(c(1,0,          # struc static (model UI)
                      1,1,          # struc dynamic (model UV)
                      0,0,          # func static (model DI)
                      0,1), 4,2, byrow=TRUE) # func dynamic (model DV)
```

#1. struct. connectivity (nwork position only) + static effect (beta\_t = beta)  
) (model UI)

#2. struct. connectivity (nwork position only) + dynamic effect (beta\_t)  
(model UV)

#3. funct. connectivity (z-weighted) + static effect (beta\_t = beta)  
(model DI)

#4. funct. connectivity (z-weighted) + dynamic effect (beta\_t)  
(model DV)

#1 and 2 are \*non\*-demographic or demographically naive

#3 and 4 are demographic connectivity

```
data <- list(mod.binary=mod.binary,
             probs=c(0.25,0.25,0.25,0.25),
             Area=Area,
             Y=Y,
             K=K,
             dmat=dmat,
             z=z)
```

## #constants

```
consts <- list(  mods=as.numeric(c(1,2,3,4)), # the List of models referenc
ed above
                 nyear.obs=nyear.obs, # number of years in data
                 nyear.sim=nyear.sim,
                 nsite=nsite,          # number of sites in data
                 e.dyn=0
                 )
```

```
params <- c("pick") # the parameter to track, which shows which model is sele
cted by the GVS process
```

```
inits <- function(){
```

```

list( psi1=runif(1,0.1,0.9),
      pick=1,
      p_mu=rnorm(1,0,0.1),
      p_sd=runif(1,0.1,1),
      P_t=rnorm(nyear.obs,0,0.1),

      alpha_mu=rnorm(1,0,0.1),
      alpha_sd=runif(1,0.1,1),
      b1_mu=rnorm(1,0,0.1),
      b1_sd=runif(1,0.1,1),
      B1_t=rnorm(nyear.sim-1,0,0.1),

      g0_mu=runif(1,-1,1),
      g1_mu=rnorm(1,-1,0.1),
      G0_t=rnorm(nyear.sim-1,0,0.1),
      G1_t=rnorm(nyear.sim-1,0,0.1))
}

source("gvs.R")

mp_modelselect <- nimbleMCMC(code=modelselection,
                             constants=consts,
                             data=data, inits=inits2, monitors = params,
                             nchains=3, niter = 110000, nburnin = 10000,
                             thin = 1, summary = TRUE, WAIC = FALSE,
                             check= TRUE, samples = TRUE, samplesAsCodaMCMC=TRUE)
save(mp_modelselect, file=paste("mp_modselect",format(Sys.time(), "%Y%m%d"),
".RData", sep=""))

```
